# Supplementary material
Source: ML conference proceedings conference paper supplement (https://openreview.net/forum?id=se2oxj-6Nz)
Supplement: supplementary_material [file attachment]

---

# Rethinking Image Restoration for Object Detection

---

Anonymous Author(s)

Affiliation

Address

email

## Overview

1 In the supplemental material, we first give the proof of Theorem 1 in Section 1. We then analyze the  
2 convergence rate of Algorithm 1 in Section 2. Then we attach more results of targeted attack results  
3 on test sets for YOLOv3 [14] and Faster-RCNN [15] in Section 3. We then qualitatively compare our  
4 method with conventional training on several more real-world samples from RTTS and ExDark in  
5 Section 4. In Section 5 the statistics of object detection datasets are provided.

## 6 1 Proof of Theorem

7 **Proposition 1** Let  $f, g : U \rightarrow \mathbb{R}$  be convex functions in a domain  $U \subset \mathbb{R}^d$ . We have two optimization  
8 problems with coefficients  $s > 0$  and  $\beta > 0$

$$\min_{\mathbf{x} \in U} f(\mathbf{x}) \text{ s.t. } g(\mathbf{x}) \leq s, \quad (1)$$

$$\min_{\mathbf{x} \in U} f(\mathbf{x}) + \beta g(\mathbf{x}). \quad (2)$$

9 We assume that some constraint qualification such as Slater Condition is satisfied for (1). Strong  
10 duality thus holds for the above problem. Then for any  $\beta > 0$ , there exist  $s > 0$  and vice versa, such  
11 that optimization problems (1) and (2) are equivalent.

12 **Proof 1.1 ((1)→(2))** Suppose  $s > 0$  and  $\mathbf{x}^*$  is the optimal solution of (1). We have the Lagrangian  
13 of (1) with Lagrangian Multiplier  $\beta \geq 0$

$$\mathcal{L}(\beta, \mathbf{x}) = f(\mathbf{x}) + \beta(g(\mathbf{x}) - s) \quad (3)$$

14 By the definition of Lagrangian dual problem,  $\beta^*$  is optimal for

$$\max_{\beta \geq 0} \min_{\mathbf{x}} \mathcal{L}(\beta, \mathbf{x}) = f(\mathbf{x}) + \beta(g(\mathbf{x}) - s) \quad (4)$$

15 The assumption of strong duality gives rise to

$$\max_{\beta \geq 0} \min_{\mathbf{x}} \mathcal{L}(\beta, \mathbf{x}) = \min_{\mathbf{x}} \max_{\beta \geq 0} \mathcal{L}(\beta, \mathbf{x}) \quad (5)$$

16  $\mathbf{x}^*$  is the optimal solution of the saddle point problem when  $\beta$  reaches optimal

$$\begin{aligned}
 \mathbf{x}^* &= \arg \min_{\mathbf{x}} \max_{\beta \geq 0} \mathcal{L}(\beta, \mathbf{x}) = f(\mathbf{x}) + \beta(g(\mathbf{x}) - s) \\
 &= \arg \min_{\mathbf{x}} \mathcal{L}(\mathbf{x}) = f(\mathbf{x}) + \beta^*(g(\mathbf{x}) - s) \\
 &= \arg \min_{\mathbf{x}} \mathcal{L}(\mathbf{x}) = f(\mathbf{x}) + \beta^*g(\mathbf{x})
 \end{aligned} \tag{6}$$

17 Therefore,  $\mathbf{x}^*$  is optimal for both (1) and (2) when  $\beta = \beta^*$ .

18 **Proof 1.2 ((2)→(1))** Suppose  $\beta > 0$  and  $\mathbf{x}^*$  is the optimal solution of (2). We want to show  $\mathbf{x}^*$  is  
 19 also optimal for (1). Let  $s = g(\mathbf{x}^*)$ . If there exist an optimal solution  $\hat{\mathbf{x}} \neq \mathbf{x}^*$  for (1) such that  
 20  $g(\hat{\mathbf{x}}) \leq s$ , we have

$$\begin{aligned}
 &f(\hat{\mathbf{x}}) < f(\mathbf{x}^*) \\
 \Rightarrow &f(\hat{\mathbf{x}}) + \beta g(\hat{\mathbf{x}}) < f(\mathbf{x}^*) + \beta s \\
 \Rightarrow &f(\hat{\mathbf{x}}) + \beta g(\hat{\mathbf{x}}) < f(\mathbf{x}^*) + \beta g(\mathbf{x}^*),
 \end{aligned} \tag{7}$$

21 which contradicts that  $\mathbf{x}^*$  is optimal for (2).

## 22 2 Convergence Analysis

23 The proof of ADAM in the original paper [7] is found incomplete by several works [18, 16]. A  
 24 failure case of ADAM is found in [16], caused by the exponential moving average. Bock *et al.* [1]  
 25 prove the local convergence in batch mode on a fixed training set. In our case, since we are  
 26 optimizing over image rather than network parameters, the assumption of deterministic training set  
 27 holds. Ward *et al.* [17] show the standard convergence rate of ADAM for a non-convex problem  
 28 is  $O(\ln(N)/\sqrt{N})$  with a scalar stepsize. Zou *et al.* [18] show that the sufficient conditions of  
 29 ADAM's convergence are an appropriate initial learning rate  $1/\sqrt{N}$  and exponential moving average  
 30 scale  $\beta_2 = 1 - 1/N$ , given  $N$  the number of steps. Défossez *et al.* [3] give a simplified proof  
 31 leading to the same convergence rate and conditions and extend the best known bound of ADAM  
 32 from  $O((1 - \beta_1)^{-5})$  to  $O((1 - \beta_1)^{-1})$ . The sign function used in previous works of adversarial  
 33 attacks [8, 5] does not affect the convergence if we consider it as a fixed updating rate  $\lambda$ . The  
 34 clamping operation restricting perturbation scale  $\delta$  and box constraint within  $[0, 1]$  may confine the  
 35 convergence but it is necessary for optimization settings.

### 36 **3 More attack results**

37 We show more results of attack on test sets in the section. In Table 1, the detection performance gain  
 38 of different attack methods for Faster-RCNN [15] is given. We can find that our method shows higher  
 39 mAP boost than TOG [2]. We further give more visualization results of detection in Figure 1, 2 for  
 hazy dataset RTTS [9] and Figure 3, 4 for low light dataset ExDark [12].

Table 1: The detection performance gain by different targeted adversarial attack methods on Faster-RCNN [15].  $\delta = 2/255$  and  $\lambda = 1/255$ .

|            | RTTS      |         |              | VOC_fog_test |         |              | VOC_clean_test |         |              |
|------------|-----------|---------|--------------|--------------|---------|--------------|----------------|---------|--------------|
|            | no attack | TOG [2] | Ours         | no attack    | TOG [2] | Ours         | no attack      | TOG [2] | Ours         |
| bicycle    | 27.15     | 48.38   | <b>55.65</b> | 44.82        | 82.46   | <b>86.49</b> | 76.34          | 87.78   | <b>91.22</b> |
| bus        | 12.70     | 38.76   | <b>48.26</b> | 54.37        | 91.37   | <b>94.59</b> | 82.24          | 95.52   | <b>97.45</b> |
| car        | 31.29     | 44.46   | <b>47.52</b> | 61.32        | 85.79   | <b>88.99</b> | 81.83          | 91.00   | <b>93.29</b> |
| motorcycle | 16.90     | 46.28   | <b>50.14</b> | 36.28        | 80.92   | <b>87.27</b> | 73.47          | 87.03   | <b>90.77</b> |
| person     | 58.55     | 67.24   | <b>70.31</b> | 52.24        | 83.16   | <b>86.03</b> | 76.58          | 86.33   | <b>88.97</b> |
| mAP        | 29.32     | 49.02   | <b>54.37</b> | 49.81        | 84.74   | <b>88.67</b> | 78.09          | 89.53   | <b>92.34</b> |

  

|           | ExDark    |         |              | VOC_dark_test |         |              | VOC_clean_test |         |              |
|-----------|-----------|---------|--------------|---------------|---------|--------------|----------------|---------|--------------|
|           | no_attack | TOG [2] | Ours         | no_attack     | TOG [2] | Ours         | no_attack      | TOG [2] | Ours         |
| bicycle   | 44.71     | 73.09   | <b>78.72</b> | 57.20         | 79.23   | <b>83.1</b>  | 76.61          | 83.83   | <b>87.79</b> |
| boat      | 31.79     | 66.8    | <b>75.68</b> | 49.45         | 75.90   | <b>83.58</b> | 62.98          | 82.58   | <b>86.74</b> |
| bottle    | 42.29     | 64.17   | <b>70.56</b> | 38.95         | 61.92   | <b>68.94</b> | 52.41          | 69.83   | <b>75.76</b> |
| bus       | 50.65     | 87.59   | <b>88.68</b> | 64.53         | 85.11   | <b>92.01</b> | 78.62          | 90.82   | <b>94.07</b> |
| car       | 38.58     | 62.71   | <b>68.94</b> | 67.48         | 82.27   | <b>86.91</b> | 81.71          | 88.80   | <b>90.96</b> |
| cat       | 41.38     | 78.97   | <b>83.74</b> | 68.72         | 87.83   | <b>92.31</b> | 86.08          | 94.83   | <b>97.74</b> |
| chair     | 35.06     | 77.14   | <b>82.62</b> | 29.84         | 64.23   | <b>74.90</b> | 49.94          | 74.64   | <b>84.14</b> |
| dog       | 46.70     | 85.98   | <b>91.01</b> | 61.34         | 90.01   | <b>95.05</b> | 80.43          | 93.73   | <b>97.81</b> |
| motorbike | 27.76     | 54.55   | <b>62.76</b> | 65.04         | 79.93   | <b>86.52</b> | 75.71          | 85.93   | <b>89.30</b> |
| person    | 40.21     | 62.60   | <b>68.68</b> | 61.14         | 75.87   | <b>81.28</b> | 77.48          | 84.19   | <b>86.64</b> |
| mAP       | 39.91     | 71.36   | <b>77.14</b> | 56.37         | 78.23   | <b>84.46</b> | 72.20          | 84.92   | <b>89.09</b> |

40

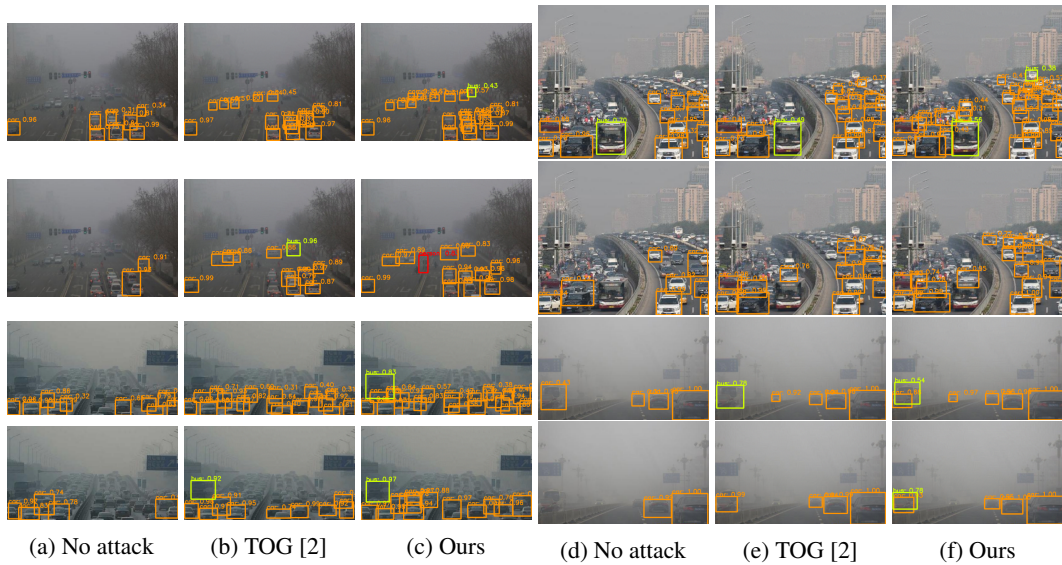

Figure 1: A comparison of object detection of different adversarial attack results on RTTS [9]. The 1st and 3rd rows are the results of YOLOv3 [14] and the 2nd and 4th are those of Faster-RCNN [15].

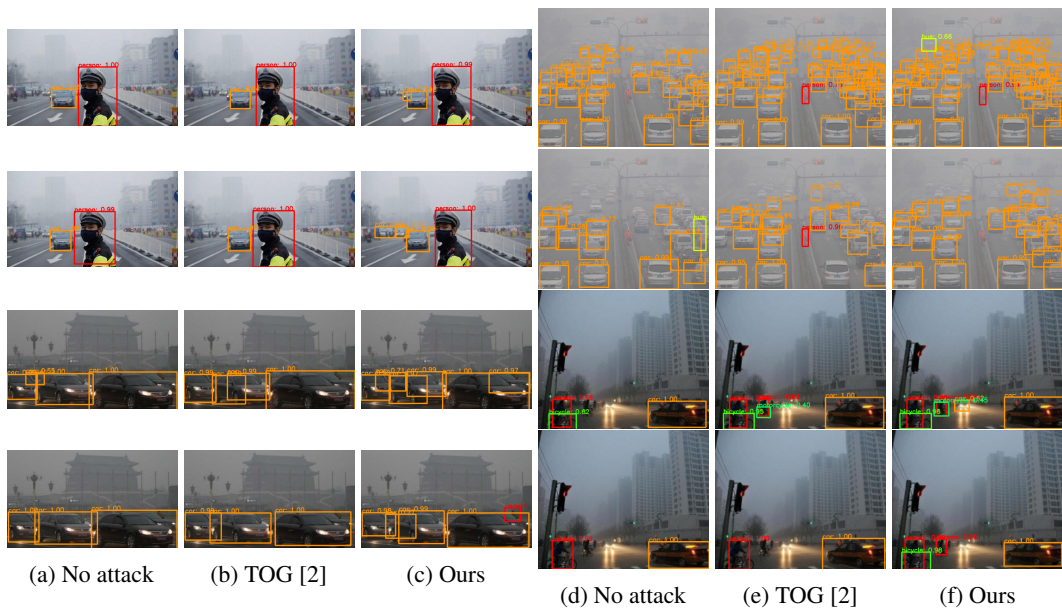

Figure 2: A comparison of object detection of different adversarial attack results on RTTS [9]. The 1st and 3rd rows are the results of YOLOv3 [14] and the 2nd and 4th are those of Faster-RCNN [15].

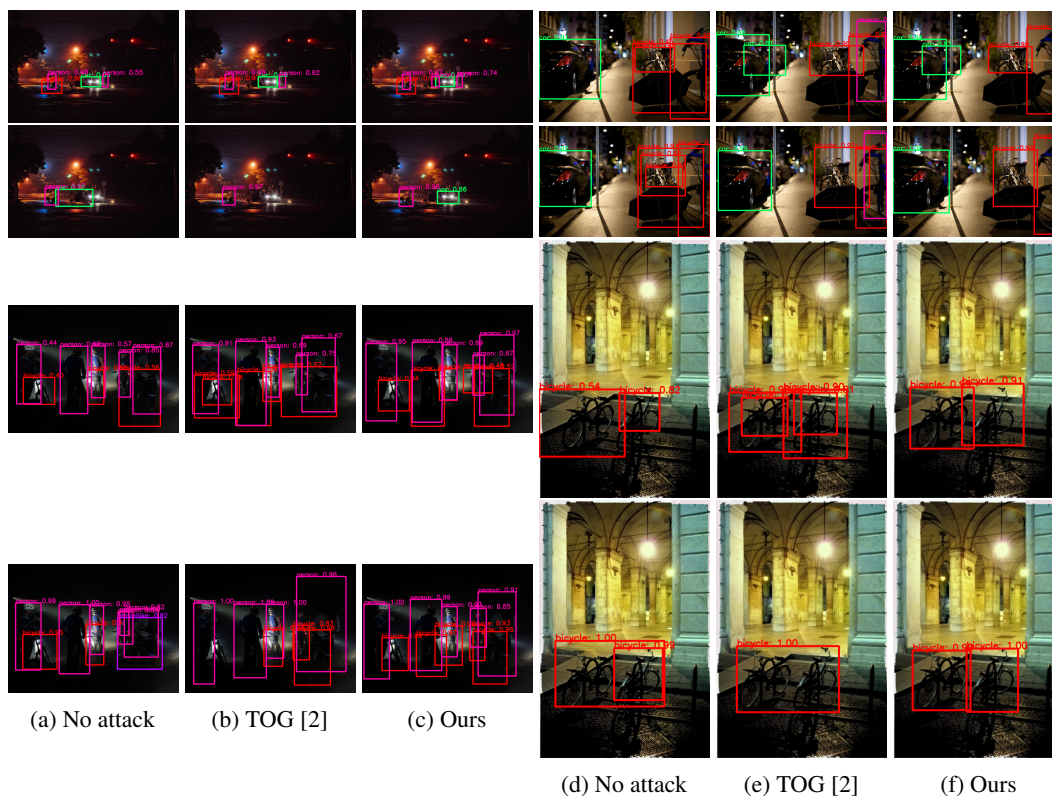

Figure 3: A comparison of object detection of different adversarial attack results on exdark [9]. The 1st and 3rd rows are the results of YOLOv3 [14] and the 2nd and 4th are those of Faster-RCNN [15].

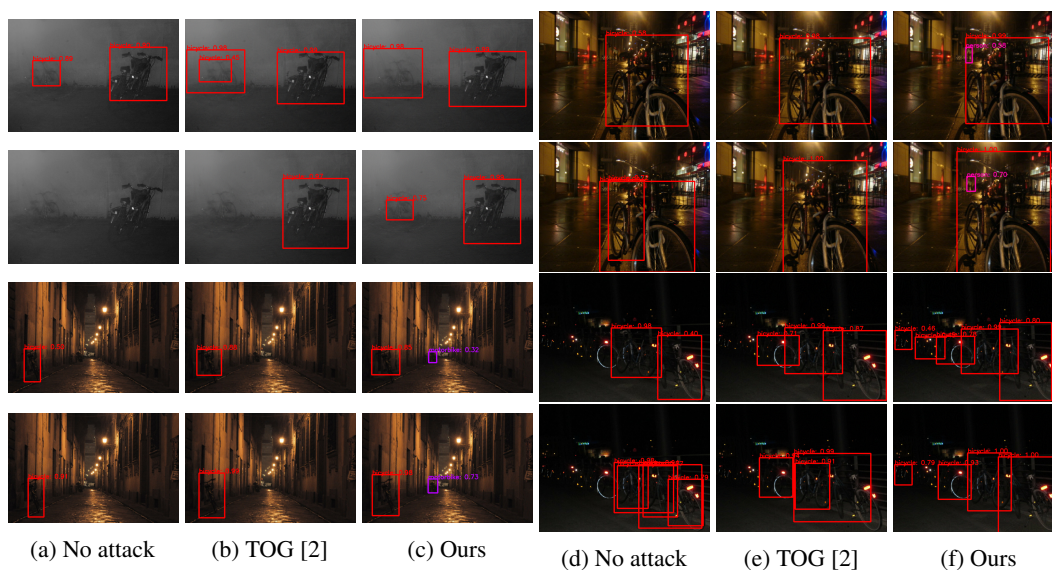

Figure 4: A comparison of object detection of different adversarial attack results on exdark [9]. The 1st and 3rd rows are the results of YOLOv3 [14] and the 2nd and 4th are those of Faster-RCNN [15].

41 **4 More results on restoration for detection**

42 The restoration and detection performance for Faster-RCNN [15] is shown ins Table 2 and Table 3.  
 43 Several more examples for detection and restoration performance are shown in Figure 5 8.

Table 2: The quantitative results of existing methods and ours with both restoration metrics and detection metrics on VOC\_fog\_test and RTTS. CT refers to conventional training. F denotes Faster-RCNN [15].

|             |      | F              | MSBDN         |        |              | GridDehaze    |        |              |
|-------------|------|----------------|---------------|--------|--------------|---------------|--------|--------------|
|             |      | No restoration | F+CT          | F+TOG  | F+Ours       | F+CT          | F+TOG  | F+Ours       |
| \vocfogtest | mAP  | 48.58          | 73.67         | 74.30  | <b>74.62</b> | 75.12         | 75.45  | <b>75.49</b> |
|             | PSNR | 13.50          | <b>28.72</b>  | 27.78  | 27.87        | <b>27.42</b>  | 27.07  | 27.04        |
|             | SSIM | 0.5411         | <b>0.8852</b> | 0.8728 | 0.8762       | <b>0.8667</b> | 0.8625 | 0.8634       |
| RTTS        | mAP  | 29.32          | 30.10         | 31.06  | <b>31.12</b> | 30.18         | 30.22  | <b>30.29</b> |

Table 3: The quantitative results of existing methods and ours with both restoration metrics and detection metrics on VOC\_dark\_test and ExDark. CT refers to conventional training. F denotes Faster-RCNN [15].

|              |      | F              | SCI           |        |              | ZeroDCE       |        |              |
|--------------|------|----------------|---------------|--------|--------------|---------------|--------|--------------|
|              |      | No restoration | F+CT          | F+TOG  | F+Ours       | F+CT          | F+TOG  | F+Ours       |
| \vocdarktest | mAP  | 56.37          | 59.89         | 60.12  | <b>60.21</b> | 59.77         | 60.03  | <b>60.06</b> |
|              | PSNR | 11.99          | <b>13.44</b>  | 13.16  | 13.31        | <b>18.23</b>  | 17.90  | 17.87        |
|              | SSIM | 0.3923         | <b>0.4891</b> | 0.4791 | 0.4803       | <b>0.6350</b> | 0.6362 | 0.6357       |
| ExDark       | mAP  | 39.91          | 42.20         | 42.38  | <b>42.34</b> | 40.47         | 41.18  | <b>41.32</b> |

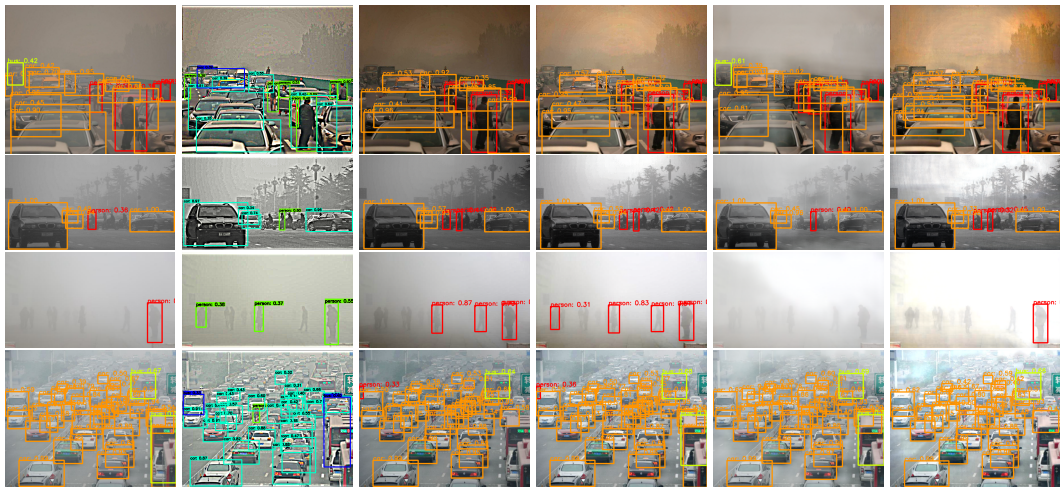

(a) No restoration    (b) [10]    (c) [4]    (d) [4]+Ours    (e) [11]    (f) [11]+Ours

Figure 5: A comparison of object detection of different adversarial attack results on RTTS [9]. The last four columns perform detection by YOLOv3[14].

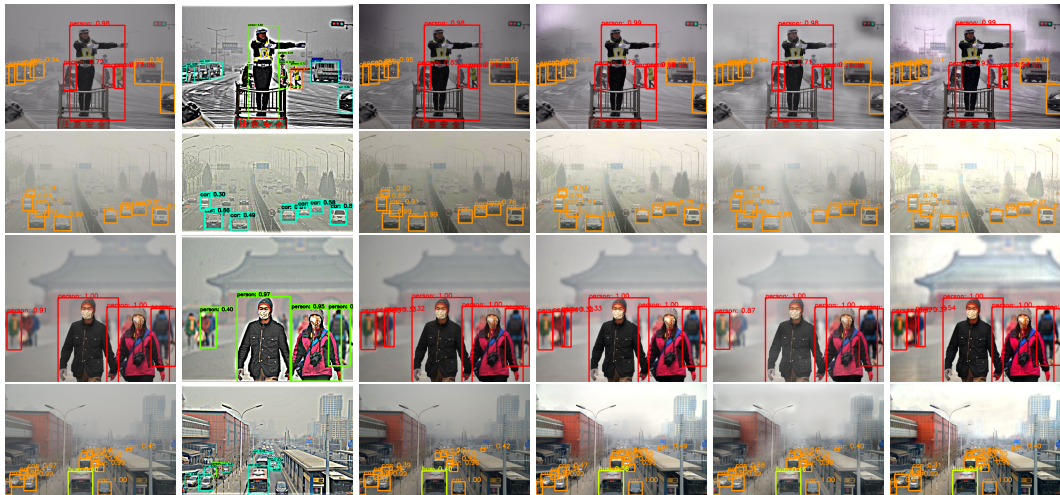

(a) No restoration    (b) [10]    (c) [4]    (d) [4]+Ours    (e) [11]    (f) [11]+Ours

Figure 6: A comparison of object detection of different adversarial attack results on RTTS [9]. The last four columns perform detection by Faster-RCNN [? ].

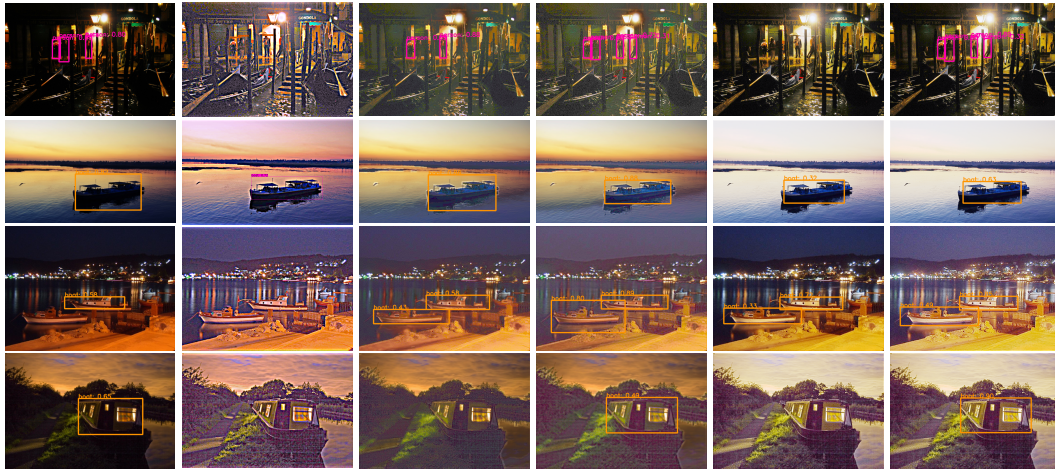

(a) No restoration (b) [10] (c) [6] (d) [6]+Ours (e) [13] (f) [13]+Ours  
 Figure 7: A comparison of object detection of different adversarial attack results on ExDark [9]. The last four columns perform detection by YOLOv3[14].

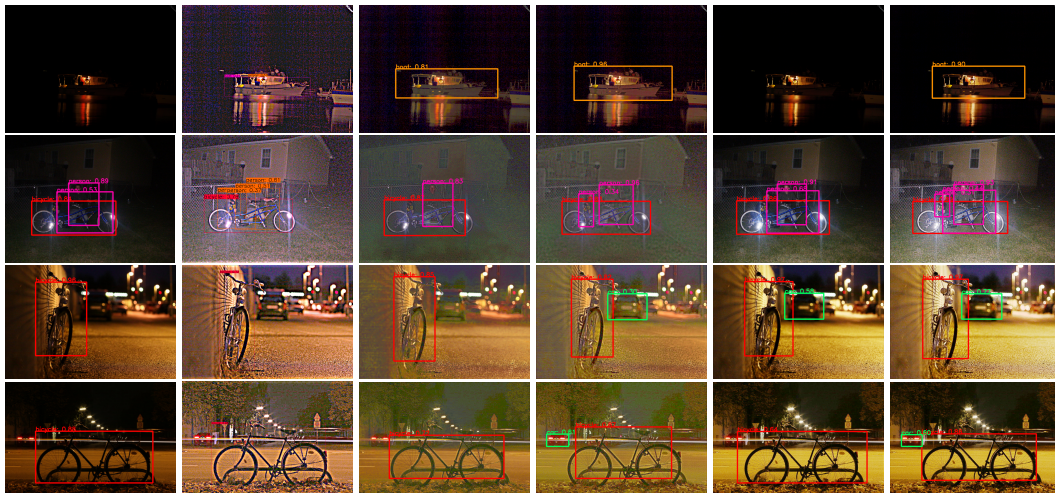

(a) No restoration (b) [10] (c) [6] (d) [6]+Ours (e) [13] (f) [13]+Ours  
 Figure 8: A comparison of object detection of different adversarial attack results on ExDark [9]. The last four columns perform detection by Faster-RCNN[15].



44 **5 Statistics of Datasets**

45 The statistics of the used datasets are provided in Table 4 and Table 5. Since there are 5 categories  
 46 in dehazing datasets and low light enhancement datasets respectively, we train YOLOv3 [14] and  
 47 Faster-RCNN [15] with 5 classes on VOC\_fog\_train and 10 classes on vocdarktrain respectively.

Table 4: The statistics of VOC\_fog\_train [10], VOC\_fog\_test [10] and RTTS [9]

|               | image | person | bicycle | car   | bus  | motorcycle | total |
|---------------|-------|--------|---------|-------|------|------------|-------|
| VOC_fog_train | 8111  | 13256  | 1064    | 3267  | 822  | 1052       | 19561 |
| VOC_fog_test  | 2734  | 4528   | 337     | 1201  | 213  | 325        | 6604  |
| RTTS          | 4322  | 7950   | 534     | 18413 | 1838 | 862        | 29577 |

Table 5: The statistics of VOC\_dark\_train [10], VOC\_dark\_test [10] and ExDark [12]

|                | image | person | bicycle | car  | bus | motorbike | boat | bottle | cat  | chair | dog  | total |
|----------------|-------|--------|---------|------|-----|-----------|------|--------|------|-------|------|-------|
| VOC_dark_train | 12334 | 13256  | 1064    | 3267 | 822 | 1052      | 1140 | 1764   | 1593 | 3152  | 2025 | 29135 |
| VOC_dark_test  | 3760  | 4528   | 337     | 1201 | 213 | 325       | 263  | 469    | 358  | 756   | 489  | 8939  |
| ExDark         | 2563  | 2235   | 418     | 919  | 164 | 242       | 515  | 433    | 425  | 609   | 490  | 6450  |

## 48 References

- 49 [1] Sebastian Bock and Martin Weiß. A proof of local convergence for the adam optimizer. In *2019*  
50 *International Joint Conference on Neural Networks (IJCNN)*, pages 1–8, 2019.
- 51 [2] Ka-Ho Chow, Ling Liu, Margaret Loper, Juhyun Bae, Mehmet Emre Gursoy, Stacey Truex, Wenqi Wei, and  
52 Yanzhao Wu. Adversarial objectness gradient attacks in real-time object detection systems. In *2020 Second*  
53 *IEEE International Conference on Trust, Privacy and Security in Intelligent Systems and Applications*  
54 *(TPS-ISA)*, pages 263–272, 2020.
- 55 [3] Alexandre Défossez, Léon Bottou, Francis Bach, and Nicolas Usunier. A simple convergence proof of  
56 adam and adagrad. *arXiv preprint arXiv:2003.02395*, 2020.
- 57 [4] Hang Dong, Jinshan Pan, Lei Xiang, Zhe Hu, Xinyi Zhang, Fei Wang, and Ming-Hsuan Yang. Multi-scale  
58 boosted dehazing network with dense feature fusion. In *2020 IEEE/CVF Conference on Computer Vision*  
59 *and Pattern Recognition (CVPR)*, pages 2154–2164, 2020.
- 60 [5] Yinpeng Dong, Fangzhou Liao, Tianyu Pang, Xiaolin Hu, and Jun Zhu. Discovering adversarial examples  
61 with momentum. *arXiv preprint arXiv:1710.06081*, 2017.
- 62 [6] Chunle Guo, Chongyi Li, Jichang Guo, Chen Change Loy, Junhui Hou, Sam Kwong, and Runmin Cong.  
63 Zero-reference deep curve estimation for low-light image enhancement. In *2020 IEEE/CVF Conference on*  
64 *Computer Vision and Pattern Recognition (CVPR)*, pages 1777–1786, 2020.
- 65 [7] Diederik P Kingma and Jimmy Ba. Adam: A method for stochastic optimization. *arXiv preprint*  
66 *arXiv:1412.6980*, 2014.
- 67 [8] Alexey Kurakin, Ian J. Goodfellow, and Samy Bengio. Adversarial examples in the physical world. *ArXiv*,  
68 *abs/1607.02533*, 2017.
- 69 [9] Boyi Li, Wenqi Ren, Dengpan Fu, Dacheng Tao, Dan Feng, Wenjun Zeng, and Zhangyang Wang. Bench-  
70 marking single-image dehazing and beyond. *IEEE Transactions on Image Processing*, 28(1):492–505,  
71 2019.
- 72 [10] Wenyu Liu, Gaofeng Ren, Runsheng Yu, Shi Guo, Jianke Zhu, and Lei Zhang. Image-adaptive yolo  
73 for object detection in adverse weather conditions. In *Proceedings of the AAAI Conference on Artificial*  
74 *Intelligence*, 2022.
- 75 [11] Xiaohong Liu, Yongrui Ma, Zhihao Shi, and Jun Chen. Griddehazenet: Attention-based multi-scale  
76 network for image dehazing. In *2019 IEEE/CVF International Conference on Computer Vision (ICCV)*,  
77 pages 7313–7322, 2019.
- 78 [12] Yuen Peng Loh and Chee Seng Chan. Getting to know low-light images with the exclusively dark dataset.  
79 *Computer Vision and Image Understanding*, 178:30–42, 2019.
- 80 [13] Long Ma, Tengyu Ma, Risheng Liu, Xin Fan, and Zhongxuan Luo. Toward fast, flexible, and robust  
81 low-light image enhancement. *CoRR*, *abs/2204.10137*, 2022.
- 82 [14] Joseph Redmon and Ali Farhadi. Yolov3: An incremental improvement. *CoRR*, *abs/1804.02767*, 2018.
- 83 [15] Shaoqing Ren, Kaiming He, Ross Girshick, and Jian Sun. Faster r-cnn: Towards real-time object  
84 detection with region proposal networks. *IEEE Transactions on Pattern Analysis and Machine Intelligence*,  
85 39(6):1137–1149, 2017.
- 86 [16] J REDDI Sashank, Kale Satyen, and Kumar Sanjiv. On the convergence of adam and beyond. In  
87 *International Conference on Learning Representations*, volume 5, page 7, 2018.
- 88 [17] Rachel Ward, Xiaoxia Wu, and Leon Bottou. Adagrad stepsizes: Sharp convergence over nonconvex  
89 landscapes. In *International Conference on Machine Learning*, pages 6677–6686. PMLR, 2019.
- 90 [18] Fangyu Zou, Li Shen, Zequn Jie, Weizhong Zhang, and Wei Liu. A sufficient condition for convergences  
91 of adam and rmsprop. In *Proceedings of the IEEE/CVF Conference on Computer Vision and Pattern*  
92 *Recognition*, pages 11127–11135, 2019.
